# Supplementary material
Source: publisher site journal article supplement (https://www.dovepress.com/article/486170)
Supplement: Supplementary file 1 [file get_supplementary_file.php]

## Supplementary Document of Effect of Hyperbaric Oxygen Therapy on Patients with SARS-CoV-2 Infection: a Retrospective Cohort Study

## Manuscript ID number:486170

## sTable 1. General characteristics of IPTW data set

|  |  | Non-HBOT (n=720.3) | HBOT (n=666.1) | p-value | SMD |
| --- | --- | --- | --- | --- | --- |
| Sex, n (%) | male | 415.5 (57.7) | 302.4 (45.4) | 0.406 | 0.248 |
| Age | mean (SD) | 73.0 (13.4) | 73.0 (8.3) | 0.992 | 0.002 |
| Smoking, n (%) | no | 563.9 (78.3) | 631.6 (94.8) | 0.002 | 0.503 |
|  | yes | 149.5 (20.7) | 34.5 (5.2) |  |  |
|  | unreported | 7.0 (1.0) | 0 (0.0) |  |  |
| Neutrophil (10 ^9/L) | median (IQR) | 4.6 (3.2-6.7) | 4.3 (3.7-7.4) | 0.879 | 0.009 |
| Lymphocyte (10 ^9/L) | median (IQR) | 0.8 (0.5-1.3) | 0.5 (0.2-1.1) | 0.073 | 0.502 |
| Oxygen saturation | mean (SD) | 0.9 (0.1) | 0.91 (0.1) | 0.198 | 0.393 |
| D-Dimer (ng/ml) | median (IQR) | 280.3 (156.0-529.7) | 614.3 (351.2-812.2) | 0.001 | 0.082 |
| Interleukin-6 (pg/ml) | median (IQR) | 8.6 (3.2-35.6) | 10.5 (2.9-109.8) | 0.467 | 0.016 |
| Diseases Severity, n (%) | moderate | 242.3 (33.6) | 172.4 (25.9) | 0.739 | 0.215 |
|  | severe | 447.6 (62.1) | 441.0 (66.2) |  |  |
|  | critical | 30.4 (4.2) | 52.8 (7.9) |  |  |
| Hypertension, n (%) |  | 268.6 (37.3) | 154.1 (23.1) | 0.244 | 0.312 |
| CHD, n (%) |  | 59.0 (8.2) | 15.0 (2.3) | 0.172 | 0.269 |
| Stroke, n (%) |  | 135.3 (18.8) | 96.3 (14.5) | 0.560 | 0.116 |
| Diabetes Mellitus, n (%) | no | 505.6 (70.2) | 448.1 (67.3) | 0.819 | 0.084 |
|  | yes | 213.7 (29.7) | 218.0 (32.7) |  |  |
|  | unreported | 1.0 (0.1) | 0.0 (0.0) |  |  |
| Renal dysfunction, n (%) | no | 674.2 (93.6) | 642.6 (96.5) | 0.570 | 0.138 |
|  | yes | 45.2 (6.3) | 23.5 (3.5) |  |  |
|  | unreported | 1.0 (0.1) | 0.0 (0.0) |  |  |
| Liver dysfunction, n (%) | no | 635.2 (88.2) | 580.8 (87.2) | 0.838 | 0.063 |
|  | yes | 84.1 (11.7) | 85.4 (12.8) |  |  |
|  | unreported | 1.0 (0.1) | 0.0 (0.0) |  |  |
| Glucocorticoids, n (%) | no | 84.0 (11.7) | 35.8 (5.4) | 0.096 | 0.234 |
|  | yes | 635.3 (88.2) | 630.3 (94.6) |  |  |
|  | unreported | 1.0 (0.1) | 0.0 (0.0) |  |  |
| Antiviral therapy, n (%) |  | 445.1 (61.8) | 395.4 (59.4) | 0.864 | 0.050 |
| Standard Oxygen therapy, n (%) |  | 660.4 (91.7) | 643.5 (96.6) | 0.155 | 0.211 |
| Baricitinib, n (%) |  | 130.0 (18.1) | 83.1 (12.5) | 0.604 | 0.156 |

CHD, coronary heart disease; DM, diabetes mellitus; HBOT, hyperbaric oxygen therapy; IPTW, inverse probability of treatment weighting;

*Fisher exact test

## sTable 2. Cox regression based on IPTW data set

|  | HR | 95% CI | p-value |
| --- | --- | --- | --- |
| Smoking | 1.344 | 0.665~2.714 | 0.410 |
| Lymphocyte (0.8 ×10 9/L above) | 0.467 | 0.227~0.961 | 0.039 |
| D-dimer (1500 pg/ml above) | 2.191 | 0.946~5.074 | 0.067 |
| Glucocorticoids | 8.300 | 2.896~23.786 | <0.001 |
| HBOT | 0.000 | 0.000~0.000 | <0.001 |

HBOT: Hyperbaric oxygen therapy; HR: hazard ratio; CI: confidence interval

## sTable 3. Adverse events in the overall participants

|  | ALL (n=657) | Non-HBOT (n=630) | HBOT (n=27) | p-value |
| --- | --- | --- | --- | --- |
| Cardiovascular Event | 10 (1.52%) | 9 (1.43%) | 1 (3.70%) | 0.345* |
| cardiovascular death | 5 (0.76%) | 5 (0.79%) | 0 (0.00%) | 1.000* |
| myocardial infarction | 1 (0.15%) | 1 (0.16%) | 0 (0.00%) | 1.000* |
| stroke | 5 (0.76%) | 4 (0.63%) | 1 (3.70%) | 0.190* |
| Venous Thrombosis Event | 50 (7.61%) | 44 (6.98%) | 6 (22.22%) | 0.003 |
| pulmonary Embolism | 9 (1.37%) | 9 (1.43%) | 0 (0.00%) | 1.000* |
| lower limb thrombosis | 40 (6.09%) | 35 (5.56%) | 5 (18.52%) | 0.006 |
| thrombosis in other locations | 5 (0.76%) | 4 (0.63%) | 1 (3.70%) | 0.190* |
| Secondary infection | 79 (12.02%) | 73 (11.59%) | 6 (22.22%) | 0.096 |
| bacteria | 24 (3.65%) | 19 (3.02%) | 5 (18.52%) | <0.001 |
| fungus | 10 (1.52%) | 9 (1.43%) | 1 (3.70%) | 0.345* |
| influenza virus | 46 (7.00%) | 46 (7.30%) | 0 (0.00%) | 0.248* |
| mycoplasma or chlamydia | 14 (2.13%) | 14 (2.22%) | 0 (0.00%) | 1.000* |

HBO, hyperbaric oxygen therapy; *Fisher exact test
